# Supplementary material for: Effects of acylation and glycation treatments on physicochemical and gelation properties of rapeseed protein isolate
Source: Royal Society of Chemistry journal article supplement (doi:10.1039/c8ra07912a), 2018-01-01
Supplement: c8ra07912a1.pdf [file c8ra07912a1.pdf]

## Supporting information

### Determination of acylation degree

The degree of acylation was evaluated using ninhydrin colorimetry according to the method of Lamothe and McCormick<sup>1</sup>. Briefly, one mL each of 1% (w/v) protein samples and 2% (w/v) ninhydrin solutions respectively were mixed and the mixture heated in a boiling water bath for 5 min, followed by rapid cooling to 25 °C. Five mL of distilled water was then added to the cooled mixture and absorbance of the solution measured at a wavelength of 580 nm, with 2% (w/v) ninhydrin solution as the reference solution.

### Determination of extent of glycation

The extent of glycation (grafting degree, GD) was measured according to TNBS method described by Adler-Nissen et al. with some modifications<sup>2</sup>. The glycated proteins were dissolved in deionized distilled water at a concentration of 5mg/mL. Then, a volume of 0.25 mL glycated protein was added into 2 mL phosphate buffer (pH 8.2), subsequently, 2 mL TNBS (0.1 %, w/v) was immediately added to the mixture and heated at 50 °C in water bath for 60 min in the dark. After reaction time, 4 mL 0.1M HCl was added to the mixture for terminating the reaction, followed by rapid cooling to room temperature. The absorbance of protein solution was read at 340 nm against a blank treated as above but containing 0.25 mL of water instead of protein (SpectraMax Gemini™<sup>XS</sup>, Molecular Devices, Inc., USA). The GD was calculated as follows:

$$GD \% = \frac{A_0 - A_t}{A_0} \times 100\% \quad (1)$$

Where  $A_0$  is the amino concentration of ungrafted protein, and  $A_t$  is the amino concentration of grafted protein at a grafting duration  $t$  h.

Table S 1 Modification degree of rapeseed protein isolates

| Samples | Modification | Time (min) | Ratio*(w/w) | Grafting Degree (%) | Acylation degree (%) |
|---------|--------------|------------|-------------|---------------------|----------------------|
| RPI1    | Acylation    | –          | 1:20        | –                   | 38.0±0.2a            |
| RPI2    | Acylation    | –          | 2:20        | –                   | 47.0±0.4b            |
| RPI3    | Acylation    | –          | 3:20        | –                   | 56.0±0.3c            |
| RPI4    | Glycation    | 60         | 1:1         | 7.0±1.8a            | –                    |
| RPI5    | Glycation    | 120        | 1:1         | 12.0±1.1b           | –                    |
| RPI6    | Glycation    | 180        | 1:1         | 17.0±0.9c           | –                    |

\* For the acylation, asterisk represents the ratio between butanedioic anhydride and RPI; for the glycation, asterisk represents ratio between dextran and RPI.

<sup>a-c</sup> Different letters in the same column indicate a statistical difference between the mean values ( $p < 0.05$ ).

References:

1. P. J. Lamothe and P. G. McCormick, *Analytical chemistry*, 1972, **44**, 821-825.
2. J. Adler-Nissen, *Journal of agricultural and food chemistry*, 1979, **27**, 1256-1262.
